# Supplementary material for: Genome-wide discovery of active regulatory elements and transcription factor footprints in Caenorhabditis elegans using DNase-seq
Source: HighWire-hosted journal article supplement (doi:10.1101/gr.223735.117), 2017-10-26
Supplement: Supplementary_Text.docx [file Supplementary_Text.docx]

**Supplementary Information**

**Analysis of reproducibility using IDR**

Regions with high enrichment of reads in one DNase-seq replicate were generally observed to have high enrichment in other biological replicates from the same condition (Figure S2A; Figure S7B-C). Compared to raw peaks from HOTSPOT, filtering by IDR successfully removes peaks with low read coverage and some high scoring peaks that did not pass reproducibility. A robust correlation was observed between numbers of significant peaks and common peaks (peaks shared among biological replicates) (Figure S2B). The IDR compared to the number of significant peaks exhibits a shallow slope, indicating that we can isolate many (41,825) significant peaks at a low IDR of 0.1 (Li et al. 2011; Landt et al. 2012) (Figure S2C).

**Additional analysis of *cis*-regulatory motifs**

From noncoding DHSs associated with gut genes we recovered DNA motifs resembling binding motifs of known intestinal TFs ELT-2 and SLR-2 (McGhee et al. 2009; Kirienko et al. 2008; Kirienko and Fay 2010) (Figure S5C). In noncoding DHSs associated with neuronal genes we found the binding motif for EGL-5 which is involved in posterior nervous system development (Ferreira et al. 1999) (Figure S5D).

**Supplementary Methods**

**QPCR quality control and measuring enrichment in regulatory region**

For each nuclei sample, we compared QPCR data using primers designed against positive controls (known enhancers from the *lin-39/ceh-13* Hox complex studied in Kuntz et al. 2008) with negative controls (sequences from the same study that did not drive reporter gene expression) in order to measure the regulatory enrichment of CRMs in the DNase-treated nuclei samples. QPCR primers were designed against conserved MUSSA regions of “true positive” N1, N2, N3, N4, N7, N8, N9, N11 *lin-39/ceh-13* enhancers and N5 and N6 negative control non-enhancer regions studied by Kuntz et al. (2008; Table S2). QPCRs were performed with genomic DNA standards and absolute derivative measurement of Cp. Relative fold enrichment was compared within samples by normalizing measured concentration of each region vs. mean of negative controls (N5 and N6) (Figure S4). For each nuclear sample, we chose the digested sample from the DNase I treatment level that yielded the highest regulatory enrichment (typically between 2 and 5 fold) and used it to prepare libraries for sequencing. The libraries were multiplexed sequenced on Illumina HiSeq to yield 50bp single end reads.

**Read alignment and quality control**

Reads were analyzed using FastQC and filtered using quality threshold Q20 (Table S1). 50bp single-end reads from embryo replicates B, C, D and L1 arrest X, Y, Z replicates were trimmed to 45bp and mapped to WS220 (ce10) version of *C. elegans* genome using Bowtie 1.0.0 (Langmead et al. 2009) using settings that did not allow alignments with more than two mismatches, disallowing reads with more than two read alignments, and only permitting alignments in the best alignment “stratum”. 76bp single-end reads from embryo replicate A and L1 arrest replicates W and V did not need trimming and were mapped using identical settings. Potential PCR duplicates were removed using software SAMtools (Li et al. 2009). 50bp single end reads were sufficiently long to map reads to the *C. elegans* genome.

**Identification of DNase I hypersensitivity peaks and TF footprints and annotation**

Raw DNase I hypersensitive peaks were identified by detecting read enrichment in 150bp consecutive nucleotides using HOTSPOT peak caller specifically designed for DNase-seq (version 3; John et al. 2011). We filtered raw peak calls obtained from HOTSPOT using the irreproducibility discovery rate (IDR) framework developed for ENCODE, which uses a non-parametric copula mixture model to filter peaks into reproducible or irreproducible categories (Li et al. 2011; Landt et al. 2012). Peaks are filtered on the combination of their rank or score as well as their consistency across replicates at an IDR level of 0.1. Peaks overlapping Repeatmasker repeats were omitted. Blacklist regions from ENCODE representing known ce10 genomic regions exhibiting signal artifacts in ChIP-seq experiments were removed (ENCODE Project Consortium 2012). Overlapping peaks were merged to yield 41,825 and 23,670 DHSs peaks across embryo and L1 arrest biological replicates, respectively. DHS peak locations were annotated in exons (if 75% of region was located in exon), introns, promoter (<300bp from ATG), and intergenic regions (>300bp from ATG) using custom scripts in combination with Bedtools (Quinlan and Hall 2010) and WormBase WS241 gene models. Overlapping noncoding DHSs were merged. Noncoding DHSs were truncated to remove any remaining exon overlapping sequence. DHSs overlapping pseudogenes, tRNAs, and ncRNAs were excluded from annotation.

Footprints were identified with DNase2TF software package using a FDR threshold of 0.05 (Sung et al. 2014) to identify decreased read coverage within noncoding DHSs in regions between 6-40bp with a strand shift in reads in each biological replicate. Replicate data within each stage were merged and used to identify additional TF footprints. We used DNase2TF since it had been shown to perform significantly better and recover more accurate peaks compared to other algorithms such as Wellington and DNaseR (Sung et al. 2014).

Annotation, statistics and data analysis were performed with custom scripts using Python, Ruby, R, Bash scripting, Bedtools (Quinlan and Hall 2010), Bedops (Neph et al. 2012), and pyBedTools (Dale et al. 2011). Visualization of read coverage over normalized gene lengths and *k*-means clustering was performed using DeepTools (Ramirez et al. 2014).

**Enrichment of enhancer marks and sequence conservation in noncoding DHSs and analysis of gene expression**

Sequence conservation is measured by phyloP score across 7 related *Caenorhabditis* species. 10,000 randomizations of noncoding DHSs from embryo and L1 arrest larvae were performed and compared with observed median phyloP score. Fold enrichment of conservation is calculated against the 97.5th percentile of median phyloP of randomizations. 10,000 randomizations of noncoding DHSs from embryo and L1 arrest larvae and overlap with TSS (Chen et al. 2013), modENCODE HOT, CBP-1 embryo H3K4me3 and RNAP II regions (Gerstein et al. 2010) was performed on each randomization and compared with observed median overlap. Fold enrichment of different types of marks (TSS, CBP-1, HOT, RNA Pol II and H3K4me3) in noncoding DHSs is calculated against the 97.5th percentile of median overlap from randomizations. Null hypothesis testing was performed with one-sample, two-sided Kolmogorov-Smirnov (KS) tests.

Embryo expression data (Gerstein et al. 2010) measured in log2 of fragments per kilobase of exon per million fragments mapped (FPKM) was used to compare expression between higher and lower read coverage genes and between genes associated with different types of noncoding DHSs. Genes with varying numbers of noncoding DHSs and with or without promoter-enhancer-associated marks were compared by measuring fold changes in expression in the embryo. In order to conservatively estimate magnitude of fold changes of expression, we adjust genes whose expression is below 0.01 FPKM to a more reasonable low level of 0.01 FPKM.

**Refining prediction of genes expressed in neuronal and intestinal datasets using *cis*-regulatory motifs located within embryo noncoding DHSs**

FIMO (Grant et al. 2011) was used to identify sites of known *cis*-regulatory motifs N1 (Ruvinsky et al. 2007), ELT-2 (McGhee et al. 2009) and SLR-2 (Kirienko and Fay 2010) within the 2kb 5’ and intron regions of *C. elegans* protein-coding genes using threshold *p* < 1x10-4. Of these motif sites, were located within noncoding DHSs were also noted. Genes associated with motif sites were compared against genes enriched in neuronal and intestinal expression datasets (neuronal tiling array data from McGhee et al. 2009; dissected adult intestinal SAGE data from McGhee et al. 2007; FACS embryo intestine tiling array data from Spencer et al. 2011). Percentage of genes correctly predicted by the presence of at least one motif (Motif Only) was compared to that of the presence of at least one motif located within noncoding DHSs (Motif and Noncoding DHSs; Figure 4). Regardless of number of motifs or noncoding DHSs, each gene was counted only once if at least one was present.

**Average DNase read profile mapping across *C. elegans* cis-regulatory motifs**

FIMO (Grant et al. 2011) was used to identify sites of known *cis*-regulatory motifs within the 2kb 5’ regions of protein-coding genes in the *C. elegans* genome using threshold p < 1x10-4. For each site, DNase cleavage was measured from start of read alignment (taking into account strand orientation of each read alignment) in a window of 80bp sequence surrounding and including the motif itself, using scripts included in the pyDNase package (Piper et al. 2013). In this manner, average DNase cleavage was calculated across thousands of sites for a given motif (Figure 4; Figure S8).

**Motif discovery**

Motifs were identified within DHS peaks and footprints using DREME (Bailey et al. 2011) using E-value threshold 0.05. Entire sequences of DHS peaks and footprints greater than 10bp were used to identify motifs. For footprints less than 10bp, we included 5bp of neighboring genomic sequence. Motifs were compared to curated WormBase *C. elegans* motifs and promoter motifs from Grishkevich et al. (2011) using TOMTOM (Gupta et al. 2007) at thresholds of *q* < 0.1 and 0.05. Motif occurrences within noncoding DHSswere identified with FIMO using threshold of *q* < 0.05 and 0.025 (Grant et al. 2011).

**Gene Ontology and anatomy enrichment analysis**

Gene Ontology (GO) analysis was performed on the nearest gene using AmiGO (Gene Ontology Consortium 2000) using *p*-value threshold of 0.05 and considering only the 50 most enriched terms. Enriched terms were parsed with ReviGO(Supek et al. 2011)to visualize term relatedness and predict biological and molecular function (Motif-associated genes and their GO annotation are listed Table S4; Coordinates of noncoding DHSs near these motif-associated genes are listed in Table S5).

Anatomy term enrichment was measured using a permutation test for motif-associated genes using annotation from WormBase. Only terms with at least 100 genes associated with them were considered. We measured N number of motif-associated genes and counted anatomy terms associated with each gene. For each motif, we performed 105 permutations, randomly selecting N genes from the dataset and measured the number of associated anatomy terms. We then calculated anatomy enrichment probability for each motif, corresponding to the probability that the anatomy term appeared as or more frequently at random compared to observed value. Since lower probability indicates higher enrichment, we used a 0.05 probability cutoff to identify enriched anatomy terms for each motif.

**Differential condition comparison of gene expression between embryo and L1 arrest**

Differences in gene expression were analyzed by comparing normalized FPKM data from microarray datasets from Baugh et al. (2009) to compare 6hr L1 starved larvae and embryo expression, and between 6hr starved and 6hr fed L1 larvae. We thus generated lists of genes: the top quartile of genes upregulated in 6hr starved L1 larvae versus embryo, and top deciles of genes upregulated and downregulated in response to starvation when comparing expression observed between 6hr starved and 6hr fed L1 larvae. To compare gene expression associated with condition-specific noncoding DHSs between L1 and embryo, the L1 starved vs. embryo expression ratio of genes associated with each DHS was tested with a two-sample, two-sided KS statistical test.

**Additional L1 analysis**

Statistical enrichment analysis of PHA-4 in L1 DHSs was performed by testing 10,000 randomized permutations of L1 DHSs (all), noncoding DHSs, and for intersection with PHA-4 ChIP-seq peaks from L1 starved larvae stage (Zhong et al. 2010) and testing with the one-sample two-sided KS test. The following gene classes were identified within the L1 noncoding DHSs by comparison with existing datasets: DAF-16 target genes (top 3000 from list from Tepper et al. 2013), PHA-4 target genes (list from L1 arrest data from Zhong et al. 2010), and top quartile of genes upregulated in 6hr starved L1 larvae vs. embryo and top deciles of genes upregulated and downregulated in response to starvation between 6hr starved and 6hr fed L1 larvae (microarray expression data from Baugh et al. 2009). PHA‑4 and DAF-16 motifs in specific gene loci were detected using FIMO (Grant et al. 2011) using *p* value thresholds of 5x10-5 and 1x10-4, respectively.

**Pilot functional assay using transgenic reporter**

DHS sequences from the *ceh-13*, *icl-1* and *pha-4* loci (Table S9) were amplified from N2 genomic DNA by PCR and cloned upstream of a ∆*pes-10* minimal promoter driving expression of a nuclear-localized GFP with a *let-858* 3’UTR (cloned from L4040 vector in the Fire Vector Kit, gift of Andrew Fire, Addgene kit #1000000001). *unc-119(ed3)* mutant animals were microinjected (Mello and Fire 1995; Kelly et al. 1997) with a mixture of 50 ng/uL *unc-119* rescue plasmid, 35 ng/uL *Pttx-3::RFP* co-injection marker, and 50 ng/uL DHS reporter vector. As a control, we also injected animals with the reporter construct lacking any DHS sequence. F2 rescued animals were screened for stable expression and mixed stages were imaged on a Leica DMI 600 inverted microscope. GFP Z-stacks were maximally projected and overlaid on the corresponding bright field image using Python 3.5 and the Scikit-image library (Van der Walt et al. 2014). A few cells were examined further using a 100X objective and Nomarski optics on a Zeiss Axioskop microscope. Nomarski images of cell-type specific expression by select DHSs are shown in Figure S11.

**Table S1. Sequenced DNase-seq samples**

**(A) Sample yield and regulatory enrichment by QPCR.** Four biological replicates of embryo (A-D) and five of L1 arrest (V-Z) DNase-seq were performed. The DNA yield of each sample was measured using Qubit fluorescence.The sample with the DNase I treatment level that exhibited the highest fold QPCR regulatory enrichment (comparing *lin-39/ceh-13* Hox conserved enhancer regions vs. non-enhancer sequences from Kuntz et al. 2008; see supplementary methods) was sequenced. **(B) Read mapping to *C. elegans* genome with Bowtie 1.0.0.** Reads were mapped to the ce10/WS220 genome and alignment statistics reported by Bowtie are shown for each biological replicate: Number of 1) Reads processed by Bowtie after Q20 filtering and trimming 2) Reads with at least one reported alignment 3) Reads that failed to align 4) Reads with alignments suppressed due to multi-mapping to more than two unique genomic locations. Uniquely mapping reads ranged between 38% and 76% in these samples resulted in at least 15X coverage in each sample. Out of four embryo samples, replicates A-C showed more ideal alignment statistics, reflecting the DNA yield of biological replicates in (A).

**Table S2. QPCR validation**

QPCR primers were designed to amplify MUSSA conserved regions from “true positive” enhancers of the *lin-39/ceh-13* Hox genes (Kuntz et al. 2008), as well as negative control non-enhancer sequences, N5 and N6, previously described by Kuntz et al. (2008). See supplementary methods.

**Table S3. DNase-seq data files**

List of data files and sequence tracks are made available for download and viewing through WormBase. Raw read data and processed analysis files have been deposited in NCBI Sequence Read Archive (https://www.ncbi.nlm.nih.gov/sra) under accession number GSE97425.

**Table S4. Predicted novel regulatory motifs**

Novel regulatory motifs (shown in IUPAC and logos) were predicted by DREME in different categories of noncoding DHSs (left border). *P*-values (p-val) and erased E-value (E-val) are shown. In many cases, motifs matched a previously identified Stormo or Elemento motif (Ihuegbu et al. 2012; Elemento et al. 2005; TOMTOM Match). Motif-associated genes were selected by FIMO using a *P*-value cutoff (FIMO Threshold) to identify the presence of motifs within noncoding DHSs. Number of motif-associated genes (# of Motif Associated Genes) used in the analysis of GO enrichment using AmiGO is shown, as well as a list of Motif Associated Genes. Top enriched GO terms are shown (Gene Ontology Enrichment). If present, enriched anatomy terms (Anatomy Enrichment) are also shown.

**Table S5. Embryo noncoding DHSs associated with predicted novel regulatory motifs**

Genome coordinates (ce10) of embryo noncoding DHSs associated with predicted regulatory motifs reported in Table S4.

**Table S6. L1 arrest noncoding DHSs near genes with higher L1 arrest expression than embryo**

List of L1 arrest noncoding DHSs near genes that have higher L1 arrest expression than embryo (top quartile genes resulting from comparison of expression ratio of 6 hr L1 starved larvae versus embryo expression data from Baugh et al. 2009).

**Table S7. L1** **arrest associated noncoding DHSs near DAF-16 target genes**

List of L1 arrest associated noncoding DHSs near DAF-16 target genes (from Tepper et al. 2013).

**Table S8. L1 arrest associated noncoding DHSs near PHA-4 target genes**

List of L1 arrest associated noncoding DHSs near PHA-4 target genes (from Zhong et al. 2010).

**Table S9. Noncoding DHSs tested in enhancer activity assay in transgenic worms**

List of noncoding DHS coordinates and sequences from the *ceh-13*, *icl-1, pha-4, hlh-1,* and *unc-120* loci that were tested for ability to drive reporter gene expression in transgenic *C. elegans,* as well as expression patterns observed.

**Figure S1. Experimental method and computational analysis**

**(A) Experimental Method.** Wild-type N2 worms were grown synchronously for at least two generations. Embryos at around the 40-cell stage or L1 arrest larvae were collected and frozen at -80°C. Freeze-thaw cycles in a nuclei purification buffer and a Dounce homogenizer were used to isolate nuclei. Nuclei (blue) were purified by spinning on Optiprep density gradient medium and visualized with DAPI (see supplementary methods). Nuclei were divided into aliquots and DNase I treatment was performed at 0, 20, 40, 80, 120, 160 U/mL DNase I concentration. Resulting DNA was isolated by treatment with Proteinase K, RNaseA, column purification, and size selection by gel extraction. DNA was quantified using Qubit fluorescence. Enrichment in regulatory regions was verified using QPCR designed against *lin-39/ceh-13* Hox enhancers. The sample with highest relative fold enrichment for regulatory regions was selected for library construction and sequencing. **(B) Computational analysis workflow.** Italics indicate the software packages used (see supplementary methods).

**Figure S2. Reproducibility across embryo biological replicates**

**(A) Reproducibility of read coverage over DHSs in embryo biological replicates.** Pair-wise comparisons of embryo biological replicate DNase signal across all identified Raw (green) and IDR-filtered (blue) DHSs show good reproducibility. Signal is measured in log2 of reads per base pair. Black diagonal line represents the ideal case of perfect reproducibility. **(B) Biological replicates show reproducibility of matched peaks.** Comparison between number of common peaks and significant peaks in biological replicate pairs for all raw peaks assessed together (All Peaks) or peaks matching in replicates (Matched Peaks). Pair-wise comparisons of biological replicates: A vs. B (red), B vs. C (green) and A vs. C (blue) are shown. **(C) Observed relationship between irreproducible discovery rate (IDR) threshold and number of significant peaks called in biological replicates.** 69,155 reproducible embryo DHS peaks remained after IDR filtering using threshold 0.1. Filtering for ce10 blacklist regions and repeat regions resulted in 41,825 embryo DHS peaks (see Figure S6 B-C for L1 arrest data).

**Figure S3. Additional known and novel embryo enhancer CRMs**

DNase I signal (red) from both strands of L1 arrest DNase-seq read data shown, as well as individual DNase I signal from positive (orange) and negative (green) strands.  Total DNase signal (light blue) from both strands of embryo DNase-seq read data is also shown. L1 arrest noncoding DHSs (red) and associated TF footprints (pink), as well as embryo noncoding DHSs (light blue boxes) and associated TF footprints (dark blue boxes) were detected. Asterisks indicate DHSs that were tested for enhancer activity in transgenic *C. elegans* (see supplementary methods; Table S9). Additional tracks shown are *C. elegans* RefSeq genes (black boxes with arrows), noncoding transcripts (brown boxes), and 12hr Starved L1 mRNA-seq tracks (black) from Maxwell et al. (2012), phyloP sequence conservation (dark blue) are also shown. Other comparison tracks include PHA‑4 ChIP-seq from embryo (light green) and starved L1 larvae (purple; Zhong et al. 2010). PHA-4 (purple boxes) and DAF-16 (orange boxes) motifs, as well as TSS (L1 Starved GRO-cap data from Kruesi et al. 2013; dark green boxes) are shown when relevant. MULTIZ conserved elements (magenta boxes) and RepeatMasker elements (black boxes) are shown.

**(A) *myo-2*, regulated by PHA‑4, possesses multiple upstream and intron embryo noncoding DHSs.** Noncoding DHSs and footprints are detected in 1.5 kb upstream region of *myo-2* including a pan-pharyngeal element within the *myo-2* promoter. In addition, a noncoding DHS is detected in the 6th and 10th introns of *myo-2*, both of which harbor TF footprints. The four noncoding DHSs and associated footprints coincide with PHA-4 ChIP peaks (Zhong et al. 2010). **(B) Embryo noncoding DHSs and footprints recapitulate known *myo-3* enhancers in 5’ region and first intron.** Two embryo noncoding DHSs containing TF footprints are detected in 2kb region upstream of *myo-3* and overlap with MC197 and MC165 enhancers (purple). Another noncoding DHS is detected in the first intron which also harbors TF footprints and overlaps with MC186 enhancer (purple) and three ncRNA transcripts K12F2.5, K12F2.4 and K12F2.3. These noncoding DHSs overlap with multiple TSS (shown) and MULTIZ conserved elements. **(C) Two known enhancers of *hlh-1* detected and additional intronic PHA-4 binding site.** Three noncoding DHSs harboring TF footprints are detected in 3kb region upstream of *hlh-1,* including the promoter, two of which overlap with known enh1 and enh2 enhancers (purple). These noncoding DHSs overlap with conserved marks of enhancer activity, such as RNAPII, CBP-1, TSS and H3K4me3 (shown) and MULTIZ elements (not shown). Another noncoding DHS is detected in the first intron, and contains TF footprints which may correspond to regions of PHA-4 binding (Zhong et al. 2010). **(D) Embryo noncoding DHSs detected between *col-43* and *sth-1 and* overlap with homeodomain binding sites required for enhancer-blocking**. Two noncoding DHSs (light blue) harboring TF footprints are detected in intergenic region between *col-43* and *sth-1*. Of these, one overlaps with HB1 homeodomain site bound by MAB-18 and CEH-14 TFs as well as noncoding transcript ZC513.16 (Bando et al. 2005). Another DHS overlaps with the HB2 homeodomain site known to bind MAB-18 and a TSS (Chen et al. 2013). Homeodomain binding sites HB1 and HB2 are shown in purple. **(E) Noncoding DHSs of nuclear hormone receptor *nhr-4*.** Four noncoding DHSs are detected upstream of *nhr-4* in L1 arrest, all harboring TF footprints. The most proximal two are present only in L1 arrest and not in the embryo. The one located in the presumed promoter of *nhr-4* overlaps an *nhr‑4* TSS that is detected in L1 arrest but not in the embryo by GRO-cap sequencing (Kruesi et al. 2013). The other overlaps both DAF-19 (*p* < 1 x 10-4) and PHA-4 (*p* < 5 x 10-5) TF binding motifs, which does appear to be weakly bound by PHA-4 according to ChIP-seq (Zhong et al. 2010). **(F) Analysis of the *ceh-13* locus.** A noncoding DHS containing TF footprints is detected in an evolutionarily conserved part of the I8 CRM (reported as “false negative” in Kuntz et al. 2008) able to drive reporter expression. A second noncoding DHS containing TF footprints is also detected in the known highly conserved N10 enhancer. A third noncoding DHS harbors a TF footprint that overlaps with N11 enhancer and conserved MUSSA sub-region. Three other noncoding DHSs containing TF footprints are detected in conserved regions downstream of *ceh-13* and in its first intron. These noncoding DHSs are in regions of the *lin-39/ceh-13* Hox cluster not tested in the Kuntz et al. (2008) study but which are transcribed in embryos (Chen et al. 2013).

**Figure S4. Regulatory enrichment by QPCR**

QPCR was performed on DNase I-treated DNA using primers designed to amplify conserved parts of known enhancers and negative control regions N5, N6 (see supplementary methods; Table S2). Fold enrichment is measured by normalizing measured QPCR concentration by the average concentration of negative control regions. A range of DNase I concentrations from 0 (red), 10 (orange), 20 (magenta), 40 (yellow), 80 (green), 120 (blue), and 160 (purple) U/mL were used to treat each sample. The sample with DNase I concentration exhibiting the highest relative fold regulatory enrichment was sequenced. In the cases of embryo replicates A-C, these were 160 U/mL, 80 U/mL, and 120 U/mL, respectively. In the cases of L1 arrest replicates X-Z, these were 80 U/mL, 20 U/mL, 160 U/mL, 80 U/mL and 160 U/mL, respectively.

**Figure S5. Frequency of TF footprints, Noncoding DHSs, and genes and motifs predicted from noncoding DHSs for tissue-specific gene sets**

**(A) Percentage of embryo noncoding DHSs containing footprints for different promoter/enhancer-associated marks.** The number of noncoding DHSs that were observed with footprints (darker shading) or without footprints (lighter shading) are shown for each type of enhancer-associated mark: TSS (pink), H3K4me3 (emerald green), RNAPII (purple), CBP-1 (orange), HOT (blue) or All Marks (lime green), and for the noncoding DHSs as a whole (red). (**B) Number of embryo noncoding DHSs per gene.** Distribution of noncoding DHSs overlapping near protein-coding genes shows that 53% (10,890) of protein-coding genes were assigned at least one embryo noncoding DHS nearby, according to annotation that assigned the nearest gene to each noncoding DHS. 9822 (47%) of genes were not annotated with nearby embryo noncoding DHS. 17% (1,901) were annotated with more than four embryo noncoding DHSs. **(C) Known gut motifs identified****.** Two motifs identified in our analysis of overrepresented motifs in noncoding DHSs of gut-expressed genes (genes identified in SAGE of dissected adult *C. elegans* intestine by McGhee et al. 2007) match known binding motifs of two Gut TFs, SLR-2 and ELT-2. Shown are the motif comparisons between the identified motifs from DREME and the consensus motifs (Kirienko and Fay 2010; McGhee et al. 2009) and their associated *p* and *q*-value measured by TOMTOM. **(D) Known** **neuronal motif identified.** A motif identified in our analysis of overrepresented motifs in genes expressed in neurons (genes identified in SAGE of FACS-sorted neurons by Spencer et al. 2011) matches the known binding motif of a neuronal TF, EGL-5. Shown is the motif comparison between identified motif from DREME and consensus motif from Gerstein et al. (2010) and the associated *p* and *q*-value measured by TOMTOM.

**Figure S6. Known *C. elegans* motifs recovered from noncoding DHSs**

**(A) Noncoding peak motifs.** Motifs found in noncoding DHSs match many *C. elegans* regulatory motifs, including promoter T-blocks (Grishkevich et al. 2011), and TF binding motifs of PHA-4 (Gaudet et al. 2004), EFL-1, UNC-55, GEI-11, and EGL-27. (**B) Promoter peak motifs.** Motifs found in promoter DHSs match SP1 and TATA-box core promoter motifs (Grishkevich et al. 2011), and TF binding motifs of ELT-2 (McGhee et al. 2009), and CEH-28. **(C) Intergenic peak motifs.** Motifs found in intergenic DHSs match the Kozak motif (Grishkevich et al. 2011), and TF binding motifs of SLR-2 (Kirienko and Fay 2010), N1 neuronally-enriched motif (Ruvinsky et al. 2007), EGL-5, and NHR-6. **(D) Intron peak motifs.** Overrepresented Motifs found in intron DHSs match several known regulatory motifs, including Kozak sequences (Grishkevich et al. 2011) and the EGL-5 TF binding motif. Many motifs were found by modENCODE (Gerstein et al. 2010; Araya et al. 2014).

**Figure S7. L1 Arrest Associated Noncoding DHSs are more highly expressed in L1 arrest than in the embryo**

**(A) Genomic location of L1 arrest DHSs shows abundance of noncoding DHSs.** L1 arrest DHSs were annotated according to position relative to WormBase WS241 protein‐coding genes: exons (blue) and noncoding (red). Noncoding DHSs are further subdivided into introns (pink), promoter (defined as less than 300bp 5’ of ATG; yellow) and intergenic (orange) regions. 67% of L1 arrest DHSs were annotated in noncoding regions, with 33% annotated in exons. Within L1 arrest noncoding DHSs, 27%, 13% and 28% were annotated in introns, promoters, and intergenic regions, respectively. **(B)** **L1 Arrest biological replicates show reproducibility of matched peaks.** Comparison between number of common peaks and significant peaks in pairs of L1 arrest biological replicates when all raw peaks are assessed together (All Peaks) or peaks matching in replicates (Matched Peaks). Pairwise comparisons of L1 arrest biological replicates: A vs. Z vs. Y (black), Z vs. X (red), Z vs. W (purple), Z vs. V (green), Y vs. X (blue), Y vs. W (light blue), Y vs. V (violet), X vs. W (orange), X vs. V (grey), W vs. V (brown) are shown. **(C) Observed relationship between irreproducible discovery rate (IDR)** **threshold and number of significant peaks called in biological replicates.** 49,882 reproducible L1 arrest DHSs peaks remained after IDR filtering using threshold 0.1 (indicated by black dotted line). Filtering for ce10 blacklist regions and repeat regions resulted in 23,670 L1 arrest DHS peaks. **(D) Expression ratio of genes possessing L1 or embryo condition-specific noncoding DHS.** Boxplot showing the ratio of expression of genes possessing L1 (blue) or embryo (yellow) condition-specific noncoding DHSs. Ratio is measured by dividing the expression observed in 6hr L1 starved larvae by embryo expression (data from Baugh et al. 2009).

**Figure S8. Average DNase I profile over *C. elegans* regulatorymotif sites**

Known *C. elegans* regulatory motif sites show characteristic patterns of accessibility to DNase I cleavage and demonstrate strand-shift in reads that is indicative of TF footprints. Average DNase I profile is calculated over thousands of predicted motif sites within the 2 kb upstream region of genes using the start sites of reads across 80bp region surrounding the motif. Positive strand is shown in red and negative strand is shown in green. Light blue indicates the base pair position of the motif site: EGL‑5, EGL-27, N1, SP1, PHA-4 motifs 3, 4, 11, and NHR-6.

**Figure S9. Analysis of Normalized Read Coverage and TF Footprint Abundance for Embryo Noncoding DHSs at Varying Distances to the Nearest Gene**

**(A) Normalized Read Coverage.** Similar normalized read coverage is observed over noncoding DHSs, regardless of their distance to the nearest gene (binned in 2kb intervals from 0 to 10kb distance). **(B) TF Footprint Abundance.** Similar number of footprints (the median is observed to be two) are observed over noncoding DHSs, regardless of distance to nearest gene.

**Figure S10. Background expression of reporter gene construct.**Transgenic animals carrying the GFP reporter construct without any DHS show background expression in embryo (A) and early larval stages (B). Faint expression is also observed in head cells of larval stages (C) and adult, in particular one bright cell above the intestine (D, arrowhead). Posterior intestine expression is also occasionally observed in adults (E).

**Figures S11. Detailed Nomarski images of cell-type specific expression from DHSs**

(A) A DHS in *pha-4* promoter (labeled as C2) drives expression in the uterus and vulva (likely vulC). (B) A DHS in *pha-4* promoter (labeled as C3) drives expression in cells of the somatic gonad. (C) A DHS in *ceh-13* 3’ distal region (labeled as A2) drives expression in uv2 uterine cells.
